# Supplementary material for: Extension of the Unified Theory of Acceptance and Use of Technology 2 model for predicting mHealth acceptance using diabetes as an example: a cross-sectional validation study
Source: HighWire-hosted journal article supplement (doi:10.1136/bmjhci-2022-100640), 2022-11-01
Supplement: bmjhci-2022-100640supp001_data_supplement.pdf [file bmjhci-2022-100640supp001_data_supplement.pdf]

**SUPPLEMENTAL MATERIAL 1**

Table A: Evaluation of discriminant validity using HTMT ratio of the correlations

|            | <b>BI</b> | <b>EE</b> | <b>FC</b> | <b>HM</b> | <b>HT</b> | <b>PDT</b> | <b>PE</b> | <b>PV</b> | <b>SI</b> | <b>TR</b> |
|------------|-----------|-----------|-----------|-----------|-----------|------------|-----------|-----------|-----------|-----------|
| <b>BI</b>  |           |           |           |           |           |            |           |           |           |           |
| <b>EE</b>  | 0.321     |           |           |           |           |            |           |           |           |           |
| <b>FC</b>  | 0.425     | 0.747     |           |           |           |            |           |           |           |           |
| <b>HM</b>  | 0.329     | 0.389     | 0.469     |           |           |            |           |           |           |           |
| <b>HT</b>  | 0.550     | 0.265     | 0.541     | 0.586     |           |            |           |           |           |           |
| <b>PDT</b> | 0.177     | 0.028     | 0.072     | 0.038     | 0.272     |            |           |           |           |           |
| <b>PE</b>  | 0.575     | 0.290     | 0.487     | 0.406     | 0.708     | 0.137      |           |           |           |           |
| <b>PV</b>  | 0.357     | 0.330     | 0.429     | 0.490     | 0.492     | 0.061      | 0.298     |           |           |           |
| <b>SI</b>  | 0.273     | 0.220     | 0.368     | 0.324     | 0.495     | 0.186      | 0.460     | 0.327     |           |           |
| <b>TR</b>  | 0.467     | 0.394     | 0.475     | 0.491     | 0.475     | 0.121      | 0.503     | 0.469     | 0.223     |           |
