# Supplementary material for: Extension of the Unified Theory of Acceptance and Use of Technology 2 model for predicting mHealth acceptance using diabetes as an example: a cross-sectional validation study
Source: HighWire-hosted journal article supplement (doi:10.1136/bmjhci-2022-100640), 2022-11-01
Supplement: bmjhci-2022-100640supp002_data_supplement.pdf [file bmjhci-2022-100640supp002_data_supplement.pdf]

**SUPPLEMENTAL MATERIAL 2**

Table B: Collinearity assessment between exogenous constructs using inner VIF values

|     | BI    | EE | FC | HM | HT | PDT | PE | PV | SI | TR | UB    |
|-----|-------|----|----|----|----|-----|----|----|----|----|-------|
| BI  |       |    |    |    |    |     |    |    |    |    | 1.332 |
| EE  | 1.594 |    |    |    |    |     |    |    |    |    |       |
| FC  | 1.741 |    |    |    |    |     |    |    |    |    | 1.233 |
| HM  | 1.488 |    |    |    |    |     |    |    |    |    |       |
| HT  | 1.737 |    |    |    |    |     |    |    |    |    | 1.364 |
| PDT | 1.067 |    |    |    |    |     |    |    |    |    |       |
| PE  | 1.672 |    |    |    |    |     |    |    |    |    |       |
| PV  | 1.378 |    |    |    |    |     |    |    |    |    |       |
| SI  | 1.293 |    |    |    |    |     |    |    |    |    |       |
| TR  | 1.504 |    |    |    |    |     |    |    |    |    |       |
| UB  |       |    |    |    |    |     |    |    |    |    |       |
