# Supplementary material for: Extension of the Unified Theory of Acceptance and Use of Technology 2 model for predicting mHealth acceptance using diabetes as an example: a cross-sectional validation study
Source: HighWire-hosted journal article supplement (doi:10.1136/bmjhci-2022-100640), 2022-11-01
Supplement: bmjhci-2022-100640supp003_data_supplement.pdf [file bmjhci-2022-100640supp003_data_supplement.pdf]

**SUPPLEMENTAL MATERIAL 3**Table C: path coefficients (behavioral intention),  $p < 0.05$ 

| Path     | Path coefficient | T statistics | p-value |
|----------|------------------|--------------|---------|
| PE → BI  | 0.285            | 4.030        | 0.000   |
| EE → BI  | 0.076            | 1.386        | 0.166   |
| SI → BI  | -0.025           | 0.523        | 0.601   |
| FC → BI  | 0.071            | 1.104        | 0.270   |
| HM → BI  | 0.002            | 0.027        | 0.979   |
| PV → BI  | 0.078            | 0.900        | 0.368   |
| HT → BI  | 0.171            | 2.239        | 0.025   |
| PDT → BI | 0.091            | 2.342        | 0.019   |
| TR → BI  | 0.145            | 2.121        | 0.034   |
