# Supplementary material for: Extension of the Unified Theory of Acceptance and Use of Technology 2 model for predicting mHealth acceptance using diabetes as an example: a cross-sectional validation study
Source: HighWire-hosted journal article supplement (doi:10.1136/bmjhci-2022-100640), 2022-11-01
Supplement: bmjhci-2022-100640supp004_data_supplement.pdf [file bmjhci-2022-100640supp004_data_supplement.pdf]

**SUPPLEMENTAL MATERIAL 4**Table D: path coefficients (use behavior),  $p < 0.05$ 

| Path    | Path coefficient | T statistics | p-value |
|---------|------------------|--------------|---------|
| BI → UB | 0.105            | 1.735        | 0.083   |
| FC → UB | -0.110           | 1.971        | 0.049   |
| HT → UB | 0.362            | 5.706        | 0.000   |
