# Supplementary material for: Extension of the Unified Theory of Acceptance and Use of Technology 2 model for predicting mHealth acceptance using diabetes as an example: a cross-sectional validation study
Source: HighWire-hosted journal article supplement (doi:10.1136/bmjhci-2022-100640), 2022-11-01

**SUPPLEMENTAL MATERIAL 5**

Figure A: Original UTAUT2 model without constructs PDT and TR, including path coefficients and adjusted coefficient of determination

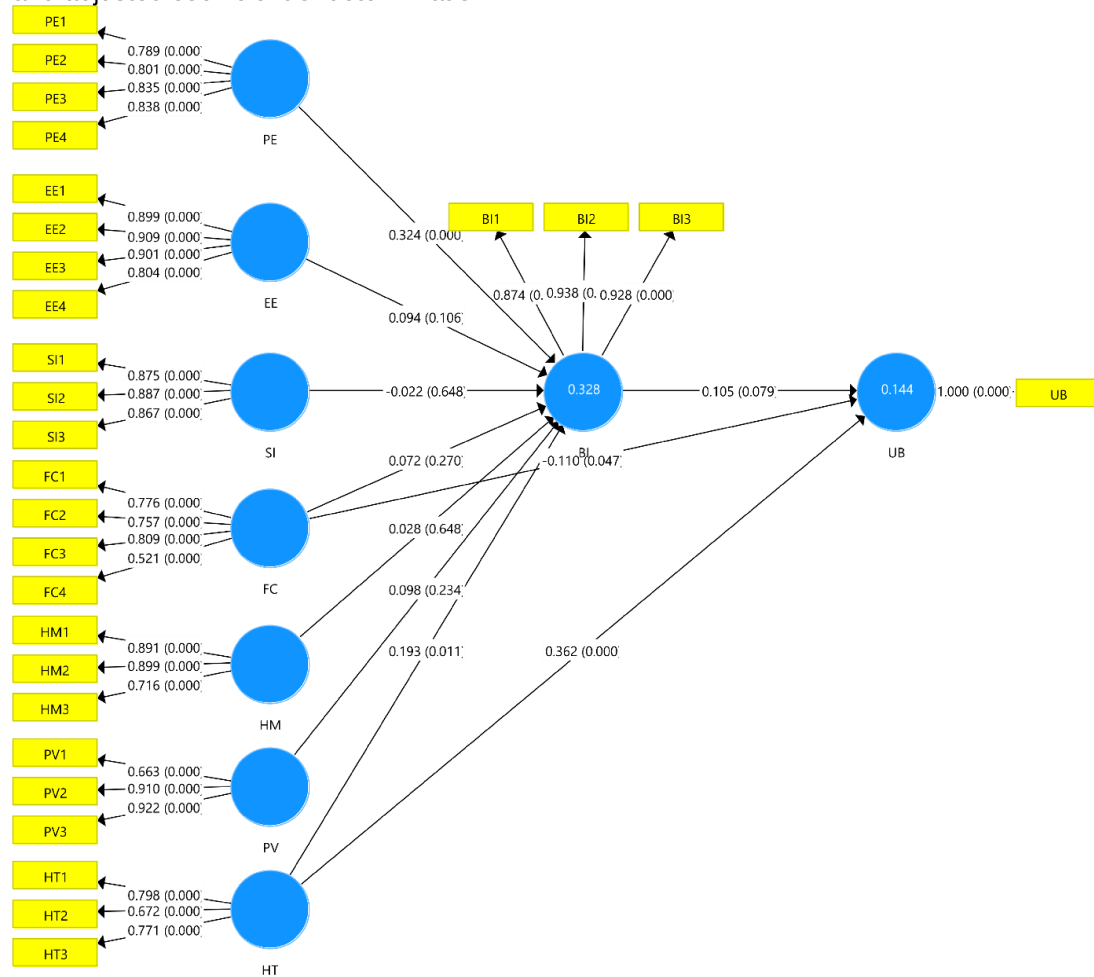

Supplement: bmjhci-2022-100640supp005_data_supplement.pdf [file bmjhci-2022-100640supp005_data_supplement.pdf]
